# Supplementary material
Source: ML conference proceedings conference paper supplement (https://proceedings.neurips.cc/paper_files/paper/2020/hash/803ef56843860e4a48fc4cdb3065e8ce-Abstract.html)
Supplement: Supplementary file [file 803ef56843860e4a48fc4cdb3065e8ce-Supplemental.pdf]

## A Miscellaneous Results and Supporting

### A.1 Properties of Stable Distributions

We will use the following property of stable distributions:

**Lemma A.1.** [Nol18] For fixed  $0 < p < 2$ , the probability density function of a  $p$  stable distribution is  $\Theta(|x|^{-p-1})$  for large  $|x|$ .

By integrating the tail bound from the previous result, we get the following simple corollary.

**Corollary A.2.** For fixed  $0 < p < 2$  and  $Z \sim \text{Stab}(p)$  and  $t$  large:

$$\mathbb{P}\{|Z| \geq t\} = \Theta(t^{-p}).$$

### A.2 Probability and High-dimensional Concentration Tools

We recall here standard definitions in empirical process theory from [Ver18].

**Definition A.3** ( $\varepsilon$ -net [Ver18]). Let  $(T, d)$  be a metric space,  $K \subset T$  and  $\varepsilon > 0$ . Then, a subset  $\mathcal{N} \subset K$  is an  $\varepsilon$ -net of  $K$  if every point in  $K$  is within a distance of  $\varepsilon$  to some point in  $\mathcal{N}$ . That is:

$$\forall x \in K, \exists y \in \mathcal{N} : d(x, y) \leq \varepsilon.$$

From this, we obtain the definition of a covering number:

**Definition A.4** (Covering Number [Ver18]). Let  $(T, d)$  be a metric space,  $K \subset T$  and  $\varepsilon > 0$ . The smallest possible cardinality of an  $\varepsilon$ -net of  $K$  is called the *covering number* of  $K$  and is denoted by  $\mathcal{N}(K, d, \varepsilon)$ .

In the most general set up, we also recall the definition of a covering number.

**Definition A.5** (Packing Number [Ver18]). Let  $(T, d)$  be a metric space,  $K \subset T$  and  $\varepsilon > 0$ . A subset  $\mathcal{P}$  of  $T$  is  $\varepsilon$ -separated if for all  $x, y \in \mathcal{P}$ , we have  $d(x, y) > \varepsilon$ . The largest possible cardinality of an  $\varepsilon$ -separated set in  $K$  is called the *packing number* of  $K$  and is denoted by  $\mathcal{P}(K, d, \varepsilon)$ .

We finally recall the following simple fact relating packing and covering numbers.

**Lemma A.6** ([Ver18]). Let  $(T, d)$  be a metric space,  $K \subset T$  and  $\varepsilon > 0$ . Then:

$$\mathcal{P}(K, d, 2\varepsilon) \leq \mathcal{N}(K, d, \varepsilon) \leq \mathcal{P}(K, d, \varepsilon).$$

In all our applications, we will take  $d(\cdot, \cdot)$  to be the Euclidean distance and the sets  $K$  will always be  $\ell_p$  balls for  $0 < p \leq 2$ . The following lemma follows from a standard volumetric argument.

**Lemma A.7.** Let  $K = \mathbb{S}_p^d$  for  $0 < p \leq 2$  and  $0 < \varepsilon \leq 1$ . Then, we have:

$$\mathcal{N}(K, \|\cdot\|_2, \varepsilon) \leq \left(\frac{3}{\varepsilon}\right)^d.$$

*Proof.* Note from [Lemma A.6] that it is sufficient to prove:

$$\mathcal{P}(K, \|\cdot\|_2, \varepsilon) \leq \left(\frac{3}{\varepsilon}\right)^d.$$

Let  $T$  be any  $\varepsilon$ -separated set in  $K$  and let  $T_\varepsilon = \{x : \exists y \in T, \|x - y\|_2 \leq \varepsilon/2\}$ . Note from the triangle inequality and the fact that  $T$  is  $\varepsilon$ -separated, that for any point  $x \in T_\varepsilon$ , there exists a unique point  $y \in T$  such that  $\|x - y\|_2 \leq \varepsilon/2$ . Now, for any point  $x \in \mathbb{S}_p^d$ , we have:

$$\|x\|_2^2 = \sum_{i=1}^d |x_i|^2 \leq \sum_{i=1}^d |x_i|^p = 1$$

where the inequality follows from the fact that  $|x_i| \leq 1$ . Therefore, we have  $T \subset \mathbb{B}_2(0, 1, d)$  where  $\mathbb{B}_2(x, r, d) = \{y \in \mathbb{R}^d : \|y - x\| \leq r\}$ . From this, we obtain from the triangle inequality that  $T_\varepsilon \subset \mathbb{B}_2(0, 1 + \varepsilon/2, d)$ . From the fact that the sets  $\mathbb{B}_2(x, \varepsilon/2, d)$  and  $\mathbb{B}_2(y, \varepsilon/2, d)$  are disjoint for distinct  $x, y \in T$ , we have:

$$\text{Vol}(T_\varepsilon) = |T| \text{Vol}(\mathbb{B}_2(0, \varepsilon/2, d)) \leq \text{Vol}(\mathbb{B}_2(0, 1 + \varepsilon/2, d)).$$

By dividing both sides and by using that fact that  $\text{Vol}(\mathbb{B}_2(0, l, d)) = l^d \text{Vol}(\mathbb{B}_2(0, 1, d))$ , we get:

$$|T| \leq \frac{\left(1 + \frac{\varepsilon}{2}\right)^d}{(2/\varepsilon)^d} = \left(1 + \frac{2}{\varepsilon}\right)^d \leq \left(\frac{3}{\varepsilon}\right)^d$$

as  $\varepsilon \leq 1$  and this concludes the proof of the lemma.  $\square$

We will also make use of Hoeffding's Inequality:

**Theorem A.8.** [BLM13] *Let  $X_1, \dots, X_n$  be independent random variables such that  $X_i \in [a_i, b_i]$  almost surely for  $i \in [n]$  and let  $S = \sum_{i=1}^n X_i - \mathbb{E}[X_i]$ . Then, for every  $t > 0$ :*

$$\mathbb{P}\{S \geq t\} \leq \exp\left(-\frac{2t^2}{\sum_{i=1}^n (b_i - a_i)^2}\right).$$

We will also require the bounded differences inequality:

**Theorem A.9.** [BLM13] *Let  $\{X_i \in \mathcal{X}\}_{i=1}^n$  be  $n$  independent random variables and suppose  $f : \mathcal{X}^n \rightarrow \mathbb{R}$  satisfies the bounded differences condition with constants  $\{c_i\}_{i=1}^n$ ; i.e  $f$  satisfies:*

$$\forall i \in [n] : \sup_{\substack{x_1, \dots, x_n \in \mathcal{X} \\ x'_i \in \mathcal{X}}} |f(x_1, \dots, x_n) - f(x_1, \dots, x'_i, \dots, x_n)| \leq c_i.$$

Then, we have for the random variable  $Z = f(X_1, \dots, X_n)$ :

$$\mathbb{P}\{Z - \mathbb{E}[Z] \geq t\} \leq \exp\left(-\frac{t^2}{2v}\right)$$

where  $v = \frac{\sum_{i=1}^n c_i^2}{4}$ .

We also present the Ledoux-Talagrand Contraction Inequality:

**Theorem A.10** ([LT11]). *Let  $X_1, \dots, X_n \in \mathcal{X}$  be i.i.d. random vectors,  $\mathcal{F}$  be a class of real-valued functions on  $\mathcal{X}$  and  $\sigma_1, \dots, \sigma_n$  be independent Rademacher random variables. If  $\phi : \mathbb{R} \rightarrow \mathbb{R}$  is an  $L$ -Lipschitz function with  $\phi(0) = 0$ , then:*

$$\mathbb{E} \sup_{f \in \mathcal{F}} \sum_{i=1}^n \sigma_i \phi(f(X_i)) \leq 2L \cdot \mathbb{E} \sup_{f \in \mathcal{F}} \sum_{i=1}^n \sigma_i f(X_i).$$

## B ADE Data Structure for Euclidean Case

---

**Algorithm 3** Compute Data Structure (Euclidean space, based on [JL84])

---

**Input:** Data points  $X = \{x_i \in \mathbb{R}^d\}_{i=1}^n$ , Accuracy  $\varepsilon$ , Failure Probability  $\delta$

$m \leftarrow \Theta\left(\frac{1}{\varepsilon^2}\right)$ ,  $l \leftarrow \Theta((d + \log(1/\delta)))$

For  $j \in [l]$ , let  $\Pi_j \in \mathbb{R}^{m \times d}$  be such that each entry is drawn iid from  $\mathcal{N}(0, 1/m)$

**Output:**  $\mathcal{D} = \{\Pi_j, \{\Pi_j x_i\}_{i=1}^n\}_{j=1}^l$

---

---

**Algorithm 4** Process Query (Euclidean space, based on [1184])
 

---

**Input:** Query Point  $q$ , Data Structure  $\mathcal{D} = \{\Pi_j, \{\Pi_j x_i\}_{i=1}^n\}_{j=1}^l$ , Failure Probability  $\delta$   
 $r \leftarrow \Theta(\log n + \log 1/\delta)$   
 Sample  $j_1, \dots, j_r$  iid with replacement from  $[l]$   
 For  $i \in [n]$ ,  $k \in [r]$ , let  $y_{i,k} \leftarrow \|\Pi_{j_k}(q - x_i)\|$   
 For  $i \in [n]$ , let  $\tilde{d}_i \leftarrow \text{Median}(\{y_{i,k}\}_{k=1}^r)$   
**Output:**  $\{\tilde{d}_i\}_{i=1}^n$

---

In this section we show that logarithmic factors may be improved in an ADE for Euclidean space specifically. Our main theorem of this section is the following.

**Theorem B.1.** *For any  $0 < \delta < 1$  there is a data structure for the ADE problem in Euclidean space that succeeds on any query with probability at least  $1 - \delta$ , even in a sequence of adaptively chosen queries. Furthermore, the time taken by the data structure to process each query is  $O(\varepsilon^{-2}(n+d)\log n/\delta)$ , the space complexity is  $O(\varepsilon^{-2}(n+d)(d + \log 1/\delta))$ , and the preprocessing time is  $O(\varepsilon^{-2}nd(d + \log 1/\delta))$ .*

In the remainder of this section, we prove [Theorem B.1](#). We start by introducing the formal guarantee required of the matrices,  $\Pi_j$ , returned by [Algorithm 3](#):

**Definition B.2.** Given  $\varepsilon > 0$ , we say a set of matrices  $\{\Pi_j \in \mathbb{R}^{m \times d}\}_{j=1}^l$  is  $\varepsilon$ -representative if:

$$\forall \|v\| = 1 : \sum_{j=1}^l \mathbf{1}\{(1 - \varepsilon) \leq \|\Pi_j v\| \leq (1 + \varepsilon)\} \geq 0.9l.$$

Intuitively, the above definition states that for any any vector,  $v$ , most of the projections,  $\Pi_j v$ , approximately preserve its length. In our proofs, we will often instantiate the above definition by setting  $v_i = \frac{q - x_i}{\|q - x_i\|}$ , for a query point  $q$  and a dataset point  $x_i$ . As a consequence the above definition, this means that most of the projections  $\Pi_j(q - x_i)$  have length approximately  $\|q - x_i\|$ . By using standard concentration arguments this also holds for the matrices sampled in [Algorithm 4](#) and the correctness of [Algorithm 4](#) follows. The following lemma formalizes this intuition:

**Lemma B.3.** *Let  $\varepsilon > 0$  and  $0 < \delta < 1$ . Then, [Algorithm 4](#) when given as input query point  $q \in \mathbb{R}^d$ ,  $\mathcal{D} = \{\Pi_j, \{\Pi_j x_i\}_{i=1}^n\}_{j=1}^l$  for an  $\varepsilon$ -representative set of matrices  $\{\Pi_j\}_{j=1}^l$ ,  $\varepsilon$  and  $\delta$  outputs a set of estimates  $\{\tilde{d}_i\}_{i=1}^n$  satisfying:*

$$\forall i \in [n] : (1 - \varepsilon)\|q - x_i\| \leq \tilde{d}_i \leq (1 + \varepsilon)\|q - x_i\|$$

with probability at least  $1 - \delta$ . Furthermore, [Algorithm 4](#) runs in time  $O((n + d)m(\log n + \log 1/\delta))$ .

*Proof.* We will first prove that  $\tilde{d}_i$  is a good estimate of  $\|q - x_i\|$  with high probability and obtain the guarantee for all  $i \in [n]$  by a union bound. Now, let  $i \in [n]$ . From the definition of  $\tilde{d}_i$ , we see that the conclusion is trivially true for the case where  $q = x_i$ . Therefore, assume that  $q \neq x_i$  and let  $v = \frac{q - x_i}{\|q - x_i\|}$ . From the fact that  $\{\Pi_j\}_{j=1}^l$  is  $\varepsilon$ -representative, the set  $\mathcal{J}$ , defined as:

$$\mathcal{J} = \{j : (1 - \varepsilon) \leq \|\Pi_j v\| \leq (1 + \varepsilon)\}$$

has size at least  $0.9l$ . We now define the random variables  $\tilde{y}_{i,k} = \|\Pi_{j_k} v\|$  and  $\tilde{z}_i = \text{Median}\{\tilde{y}_{i,k}\}_{k=1}^r$  with  $r, \{j_k\}_{k=1}^r$  defined in [Algorithm 4](#). We see from the definition of  $\tilde{d}_i$  that  $\tilde{d}_i = \|q - x_i\| \tilde{z}_i$ . Therefore, it is necessary and sufficient to bound the probability that  $\tilde{z}_i \in [1 - \varepsilon, 1 + \varepsilon]$ . To do this, let  $W_k = \mathbf{1}\{j_k \in \mathcal{J}\}$  and  $W = \sum_{k=1}^r W_k$ . Furthermore, we have  $\mathbb{E}[W] \geq 0.9r$  and since  $W_k \in \{0, 1\}$ , we have by Hoeffding's Inequality ([Theorem A.8](#)):

$$\mathbb{P}\{W \leq 0.6r\} \leq \exp\left(-\frac{2(0.3r)^2}{r}\right) \leq \frac{\delta}{n}$$

from our definition of  $r$ . Furthermore, for all  $k$  such that  $j_k \in \mathcal{J}$ , we have:

$$1 - \varepsilon \leq \tilde{y}_{i,k} \leq 1 + \varepsilon.$$

Therefore, in the event that  $W \geq 0.6r$ , we have  $(1 - \varepsilon) \leq \tilde{z}_i \leq (1 + \varepsilon)$ . Hence, we get:

$$\mathbb{P} \left\{ (1 - \varepsilon) \|q - x_i\| \leq \tilde{d}_i \leq (1 + \varepsilon) \|q - x_i\| \right\} \geq 1 - \frac{\delta}{n}.$$

From the union bound, we obtain:

$$\mathbb{P} \left\{ \forall i : (1 - \varepsilon) \|q - x_i\| \leq \tilde{d}_i \leq (1 + \varepsilon) \|q - x_i\| \right\} \geq 1 - \delta.$$

This concludes the proof of correctness of the output of [Algorithm 4](#). The runtime guarantees follow from the fact that the runtime is dominated by the cost of computing the projections  $\Pi_{j_k} v$  and the cost of computing  $\{y_{i,k}\}_{i \in [n], k \in [r]}$  which take time  $O(dmr)$  and  $O(nmr)$  respectively.  $\square$

Therefore, the runtime of [Algorithm 4](#) is determined by the dimension of the matrices,  $\Pi_j$ . The subsequent lemma bounds on this quantity as well as the number of matrices,  $l$ . In our proof of the following lemma, we use recent techniques developed in the context of heavy-tailed estimation [[LM19](#), [MZ18](#)] to obtain sharp bounds on both  $l$  and  $m$  avoiding extraneous log factors.

**Lemma B.4.** *Let  $0 < \varepsilon, 0 < \delta < 1$  and  $m, l$  be defined as in [Algorithm 3](#). Then, the output  $\{\Pi_j\}_{j=1}^l$  of [Algorithm 3](#) satisfies:*

$$\forall \|v\| = 1 : \sum_{j=1}^l \mathbf{1} \{ (1 - \varepsilon) \leq \|\Pi_j v\| \leq (1 + \varepsilon) \} \geq 0.9l$$

with probability at least  $1 - \delta$ . Furthermore, [Algorithm 3](#) runs in time  $O(\text{MM}(ml, d, n))$ .

*Proof.* We must show that for any  $x \in \mathbb{R}^d$ , a large fraction of the  $\Pi_j$  approximately preserve its length. Concretely, we will analyze the following random variable where  $l, m$  are defined in [Algorithm 3](#):

$$Z = \max_{\|v\|=1} \sum_{j=1}^l \mathbf{1} \{ |\|\Pi_j v\|^2 - 1| \geq \varepsilon \}.$$

Intuitively,  $Z$  searches for a unit vector  $v$  whose length is well approximated by the fewest number of sample projection matrices  $\Pi_j$ . We first notice that  $Z$  satisfies a bounded differences condition.

**Lemma B.5.** *Let  $k \in [l]$ ,  $\Pi'_k \in \mathbb{R}^{m \times d}$  and  $Z'$  be defined as:*

$$Z' = \max_{\|v\|=1} \mathbf{1} \{ |\|\Pi'_k v\|^2 - 1| \geq \varepsilon \} + \sum_{\substack{1 \leq j \leq l \\ i \neq k}} \mathbf{1} \{ |\|\Pi_j v\|^2 - 1| \geq \varepsilon \}.$$

Then, we have:

$$|Z - Z'| \leq 1.$$

*Proof.* Let  $Y_j(v) = \mathbf{1} \{ |\|\Pi_j v\|^2 - 1| \geq \varepsilon \}$  and  $Y'_k(v) = \mathbf{1} \{ |\|\Pi'_k v\|^2 - 1| \geq \varepsilon \}$ . The proof follows from the following manipulation:

$$\begin{aligned}
Z - Z' &= \max_{\|v\|=1} \sum_{j=1}^l Y_j(v) - \max_{\|v\|=1} Y'_k(v) + \sum_{\substack{1 \leq j \leq l \\ i \neq k}} Y_j(v) \\
&\leq \max_{\|v\|=1} \sum_{j=1}^l Y_j(v) - Y'_k(v) - \sum_{\substack{1 \leq j \leq l \\ i \neq k}} Y_j(v) \\
&= \max_{\|v\|=1} Y_k(v) - Y'_k(v) \leq 1.
\end{aligned}$$

Through a similar manipulation, we get  $Z' - Z \leq 1$  and this concludes the proof of the lemma.  $\square$

As a consequence of [Theorem A.9](#) it now suffices for us to bound the expected value of  $Z$ .

**Lemma B.6.** *We have  $\mathbb{E}[Z] \leq 0.05l$ .*

*Proof.* We bound the expected value of  $Z$  as follows, using an approach of [\[LM19\]](#) (see the proof of their Theorem 2):

$$\begin{aligned}
\mathbb{E}[Z] &\leq \frac{1}{\varepsilon} \cdot \mathbb{E} \left[ \max_{\|v\|=1} \sum_{j=1}^l \left| \|\Pi_j v\|^2 - 1 \right| \right] \\
&\leq \frac{1}{\varepsilon} \cdot \left( \mathbb{E} \left[ \max_{\|v\|=1} \sum_{j=1}^l \left| \|\Pi_j v\|^2 - 1 \right| - \mathbb{E} \left[ \|\Pi'_j v\|^2 - 1 \right] \right] + l \max_v \mathbb{E} \left[ \left| \|\Pi v\|^2 - 1 \right| \right] \right)
\end{aligned}$$

where  $\{\Pi'_j\}_{j=1}^l, \Pi$  are mutually independent and independent of  $\{\Pi_j\}_{j=1}^l$  with the same distribution. We first bound the second term in the above display. We have for all  $\|v\| = 1$ :

$$\begin{aligned}
\mathbb{E} \left[ \left| \|\Pi v\|^2 - 1 \right| \right] &\leq \sqrt{\mathbb{E} \left[ \left( \|\Pi v\|^2 - 1 \right)^2 \right]} = \sqrt{\mathbb{E} \left[ \sum_{i=1}^m \left( \langle w_i, v \rangle^2 - m^{-1} \right)^2 \right]} \\
&\leq \sqrt{\mathbb{E} \left[ \sum_{i=1}^m \langle w_i, v \rangle^4 \right]} = \sqrt{\frac{3}{m}}.
\end{aligned}$$

where  $w_i \sim \mathcal{N}(0, I/m)$  are the rows of the matrix  $\Pi$ . For the first term, we have:

$$\begin{aligned}
& \mathbb{E}_{\Pi_j} \left[ \max_{\|v\|=1} \sum_{j=1}^l \left| \|\Pi_j v\|^2 - 1 \right| - \mathbb{E}_{\Pi'_j} \left[ \|\Pi'_j v\|^2 - 1 \right] \right] \\
& \leq \mathbb{E}_{\Pi_j, \Pi'_j} \left[ \max_{\|v\|=1} \sum_{j=1}^l \left| \|\Pi_j v\|^2 - 1 \right| - \|\Pi'_j v\|^2 - 1 \right] \\
& = \mathbb{E}_{\Pi_j, \Pi'_j, \sigma_j} \left[ \max_{\|v\|=1} \sum_{j=1}^l \sigma_j \left( \|\Pi_j v\|^2 - 1 \right) - \|\Pi'_j v\|^2 - 1 \right] \quad \sigma_j \stackrel{iid}{\sim} \{\pm 1\} \\
& \leq 2 \mathbb{E}_{\Pi_j, \sigma_j} \left[ \max_{\|v\|=1} \sum_{j=1}^l \sigma_j \left| \|\Pi_j v\|^2 - 1 \right| \right] \\
& \leq 4 \mathbb{E}_{\Pi_j, \sigma_j} \left[ \max_{\|v\|=1} \sum_{j=1}^l \sigma_j \left( \|\Pi_j v\|^2 - 1 \right) \right] \quad \text{Theorem A.10} \\
& = 4 \mathbb{E}_{\Pi_j, \sigma_j} \left[ \max_{\|v\|=1} \sum_{j=1}^l \sigma_j \left( \left( \|\Pi_j v\|^2 - 1 \right) - \mathbb{E}_{\Pi'_j} \left[ \|\Pi'_j v\|^2 - 1 \right] \right) \right] \\
& \leq 4 \mathbb{E}_{\Pi_j, \Pi'_j, \sigma_j} \left[ \max_{\|v\|=1} \sum_{j=1}^l \sigma_j \left( \left( \|\Pi_j v\|^2 - 1 \right) - \left( \|\Pi'_j v\|^2 - 1 \right) \right) \right] \\
& = 4 \mathbb{E}_{\Pi_j, \Pi'_j} \left[ \max_{\|v\|=1} \sum_{j=1}^l \left( \left( \|\Pi_j v\|^2 - 1 \right) - \left( \|\Pi'_j v\|^2 - 1 \right) \right) \right] \\
& \leq 4 \mathbb{E}_{\Pi_j} \left[ \max_{\|v\|=1} \sum_{j=1}^l \left( \|\Pi_j v\|^2 - 1 \right) \right] + 4 \mathbb{E}_{\Pi'_j} \left[ \max_{\|v\|=1} - \sum_{j=1}^l \left( \|\Pi'_j v\|^2 - 1 \right) \right] \\
& \leq 8l \mathbb{E}_{\Pi_j} \left[ \left\| \frac{\sum_{j=1}^l \Pi_j^\top \Pi_j}{l} - I \right\| \right] \leq \frac{l\varepsilon}{40}
\end{aligned}$$

where the final inequality follows from the fact that  $\frac{\sum_{j=1}^l \Pi_j^\top \Pi_j}{l}$  is the empirical covariance matrix of  $ml$  standard gaussian vectors and the final result follows from standard results on the concentration of empirical covariance matrices of sub-gaussian random vectors (See, for example, Theorem 4.6.1 from [Ver18]). From the previous two bounds, we conclude the proof of the lemma.  $\square$

Now we complete the proof of Lemma B.4. From Lemmas B.5 and B.6 and Theorem A.9 we have with probability at least  $1 - \delta$ :

$$\forall \|v\| = 1 : \sum_{j=1}^l \mathbf{1} \{ \left| \|\Pi_j v\|^2 - 1 \right| \leq \varepsilon \} \geq 0.9l.$$

Now, condition on the above event. Let  $\|v\| = 1$  and let  $\mathcal{J} = \{j : \left| \|\Pi_j v\|^2 - 1 \right| \leq \varepsilon\}$ . For  $j \in \mathcal{J}$ :

$$1 - \varepsilon \leq \|\Pi_j v\|^2 \leq 1 + \varepsilon \implies 1 - \varepsilon \leq \|\Pi_j v\| \leq 1 + \varepsilon.$$

This concludes the proof of correctness of the output of Algorithm 3. The runtime guarantees follow from our setting of  $m, l$  and the fact that the runtime is dominated by the time taken to compute  $\Pi_j x_i$  for  $j \in [l]$  and  $i \in [n]$  which can be done by stacking the projection matrices into a single

large matrix  $\Pi = [\Pi_1^\top \Pi_2^\top \dots \Pi_l^\top]^\top$  and performing a matrix-matrix multiplication with the matrix containing the data points along the columns. □

[Lemmas B.3](#) and [B.4](#) now imply [Theorem B.1](#). An algorithm satisfying the guarantees of [Theorem B.1](#) follows by first constructing a data structure,  $\mathcal{D}$ , using [Algorithm 3](#) with failure probability set to  $\delta/2$  and accuracy requirement set to  $\varepsilon$ . Each query can now be answered by [Algorithm 4](#) with  $\mathcal{D}$  by setting the failure probability to  $\delta/2$ . The correctness and runtime guarantees of this construction follow from [Lemmas B.3](#) and [B.4](#) and the union bound. □

## C Lower Bound

Here we show that any Monte Carlo randomized data structure for handling adaptive ADE queries in Euclidean space with  $> 1/2$  success probability needs to use  $\Omega(nd)$  space. Since this will be a lower bound on the space complexity in bits yet thus far we have been talking about vectors in  $\mathbb{R}^d$ , we need to make an assumption on the precision being used. Fix  $\eta \in (0, 1/2)$  and define  $B_\eta := \{x \in \mathbb{R}^d : \|x\|_2 \leq 1, \forall i \in [d], x_i \text{ is an integer multiple of } \eta/\sqrt{d}\}$ . That is,  $B_\eta$  is the subset of the Euclidean ball in which all vector coordinates are integer multiples of  $\eta/\sqrt{d}$  for some  $\eta \in (0, 1/2)$ . We will show that the lower bound holds even in the special case that all database and query vectors are in  $B_\eta$ .

**Lemma C.1.**  $\forall \eta \in (0, 1/2), |B_\eta| = \exp(\Theta(d \log(1/\eta)))$

*Proof.* A proof of the upper bound appears in [\[AK17\]](#). For the lower bound, observe that if  $x_i = c_i \eta/\sqrt{d}$  for  $c_i \in \{0, 1, \dots, \lfloor 1/\eta \rfloor\}$ , then  $\|x\|_2 \leq 1$  so that  $x \in B_\eta$ . Thus  $|B_\eta| \geq \lfloor 1/\eta \rfloor^d$ . □

We now prove the space lower bound using a standard encoding-type argument.

**Theorem C.2.** Fix  $\eta \in (0, 1/2)$ . Then any data structure for ADE in Euclidean space which always halts within some finite time bound  $T$  when answering a query, with failure probability  $\delta < 1/2$  and  $\varepsilon \in (0, 1)$ , requires  $\Omega(nd \log(1/\eta))$  bits of memory. This lower bound holds even if promised that all database and query vectors are elements of  $B_\eta$ .

*Proof.* Let  $\mathcal{D}$  be such a data structure using  $S$  bits of memory. We will show that the mere existence of  $\mathcal{D}$  implies the existence of a randomized encoding/decoding scheme where the encoder and decoder share a common public random string, with  $\text{Enc} : B_\eta^n \rightarrow \{0, 1\}^S$ . The decoder will succeed with probability 1. Thus encoding length  $s$  needs to be at least the entropy of the input distribution, which will be the uniform distribution over  $B_\eta^n$ , and thus  $S \geq \lceil n \log_2 |B_\eta| \rceil$ , which is at least  $\Omega(nd \log(1/\eta))$  by [Lemma C.1](#).

We now define the encoding: we map  $X = (x_i)_{i=1}^n \in B_\eta^n$  to the memory state of the data structure after pre-processing with database  $X$  (this memory state is random since the pre-processing procedure may be randomized). The encoding length is thus  $S$  bits. We now give an exponential-time decoding algorithm which can recover  $X$  precisely given only  $\text{Enc}(X)$ . To decode, we iterate over all  $q \in B_\eta$  to discover which  $x_i$  equal  $q$  (if any). Note  $\|q - x_i\|_2 = 0$  iff  $q = x_i$ , and thus a multiplicative  $1 + \varepsilon$ -approximation to all distances would reveal which  $x_i$  are equal to  $q$ . To circumvent the nonzero failure probability of querying the data structure, we simply iterate over all possibilities for the random string used by the data structure (since  $\mathcal{D}$  runs in time at most  $T$  it always flips at most  $T$  coins, and there are at most  $2^T$  possibilities to check). Since the failure probability is at most  $1/2$ , the estimate of  $q$  to  $x_i$  will be zero more than half the time iff  $q = x_i$ . □
